# Supplementary material for: A multifunctional and highly stretchable electronic device based on silver nanowire/wrap yarn composite for a wearable strain sensor and heater
Source: Royal Society of Chemistry journal article supplement (doi:10.1039/c9tc04252k), 2019-01-01
Supplement: c9tc04252k1.pdf [file c9tc04252k1.pdf]

## Electronic Supplementary Information

Multifunctional and highly stretchable electronics based on silver nanowires / wrap yarn composite for wearable strain sensor and heater

*Min Zhao, Dawei Li, Jieyu Huang, Di Wang, Mensah Alfred, Qufu Wei<sup>1\*</sup>*

Key Laboratory of Eco-Textiles, Ministry of Education, Jiangnan University, Wuxi, Jiangsu, 214122, China. E-mail: [qfwei@jiangnan.edu.cn](mailto:qfwei@jiangnan.edu.cn)

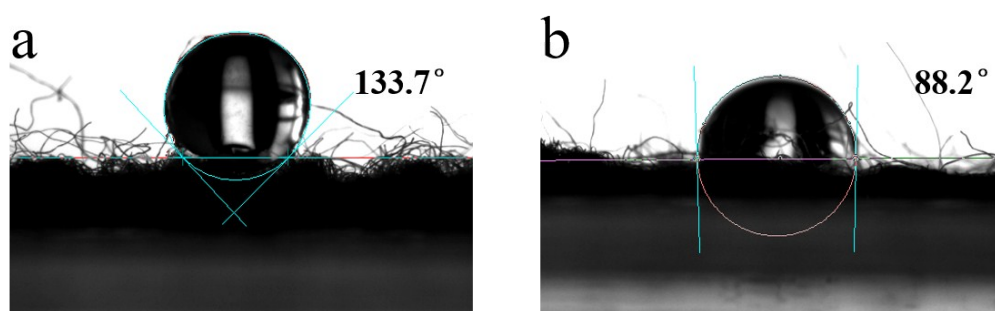

Fig. S1 (a, b) Optical photographs showing the contact angles of water on CPY as-prepared and after  $O_2$  plasma treatment.

Table S1 Relative concentration of elements in AgNWs/CPY.

| Element | Weight (%) | Atomic (%) |
|---------|------------|------------|
| C K     | 26.25      | 60.09      |
| N K     | 0.94       | 1.84       |
| O K     | 13.33      | 22.91      |
| Ag L    | 59.48      | 15.16      |

Table S2 Relative concentration of elements in AgNWs-coated CPY without polydopamine.

| Element | Weight (%) | Atomic (%) |
|---------|------------|------------|
| C K     | 66.78      | 77.83      |
| N K     | 0.02       | 0.02       |
| O K     | 23.94      | 20.95      |
| Ag L    | 9.25       | 1.20       |

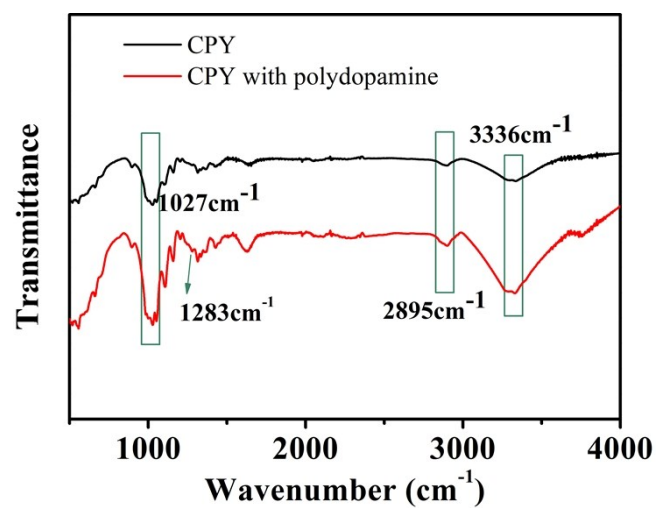

Fig. S2 FTIR spectra of CPY and CPY with polydopamine.

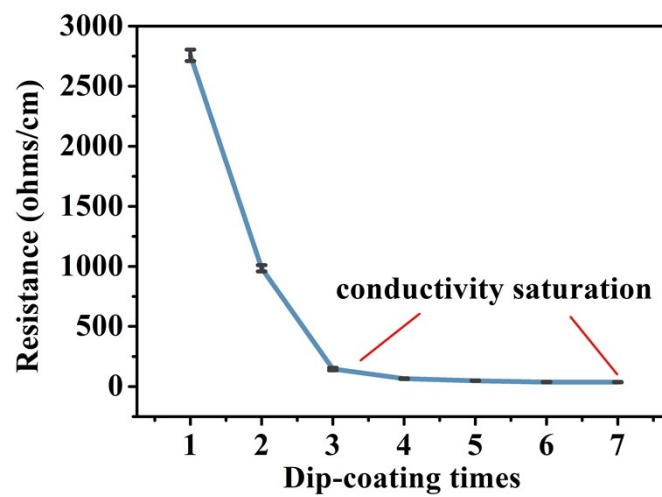

Fig. S3 Electrical resistance change of the CPYs for cycles of dip-coating of AgNWs.

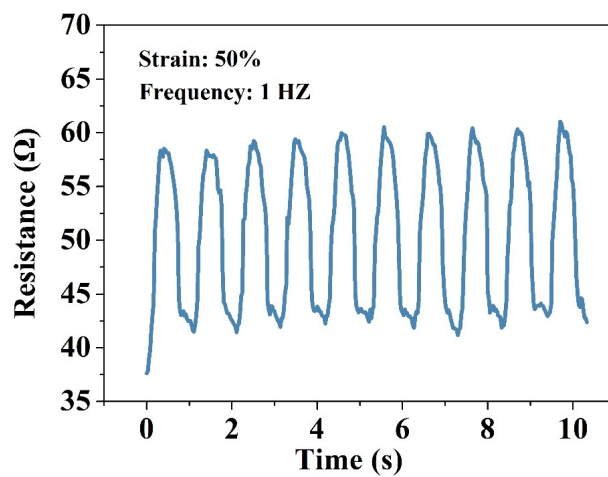

Fig. S4 Resistance change of the strain sensor under the strains of 0%-50% at 1 Hz.

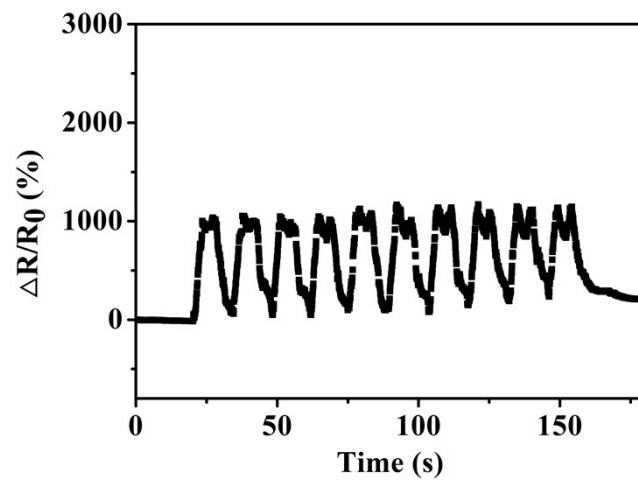

Fig. S5 Relative resistance response under cyclic stretching-releasing with 200% strain.

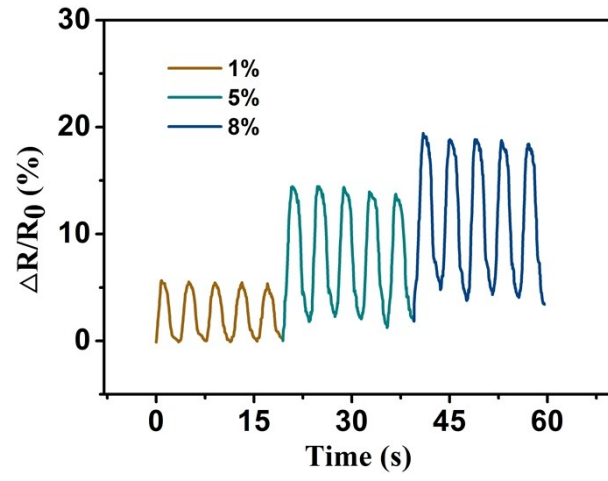

Fig. S6 Relative resistance change under small strains of 1%, 5% and 8%.



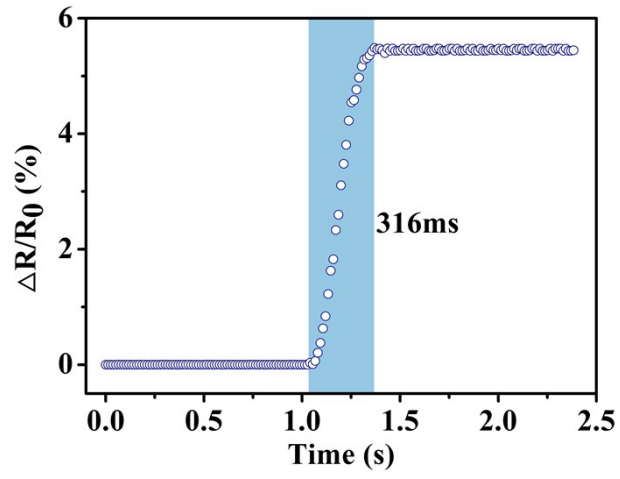

Fig. S7 Response time of the AgNWs/CPY strain sensor at 1% strain.
